# Supplementary material
Source: Springer Nature journal article supplement (https://www.springermedizin.de/resource/supplementary/12967_2009_396_MOESM4_ESM.pdf/9576380)

HCC vs CTR p01 up in HCC

Ratio

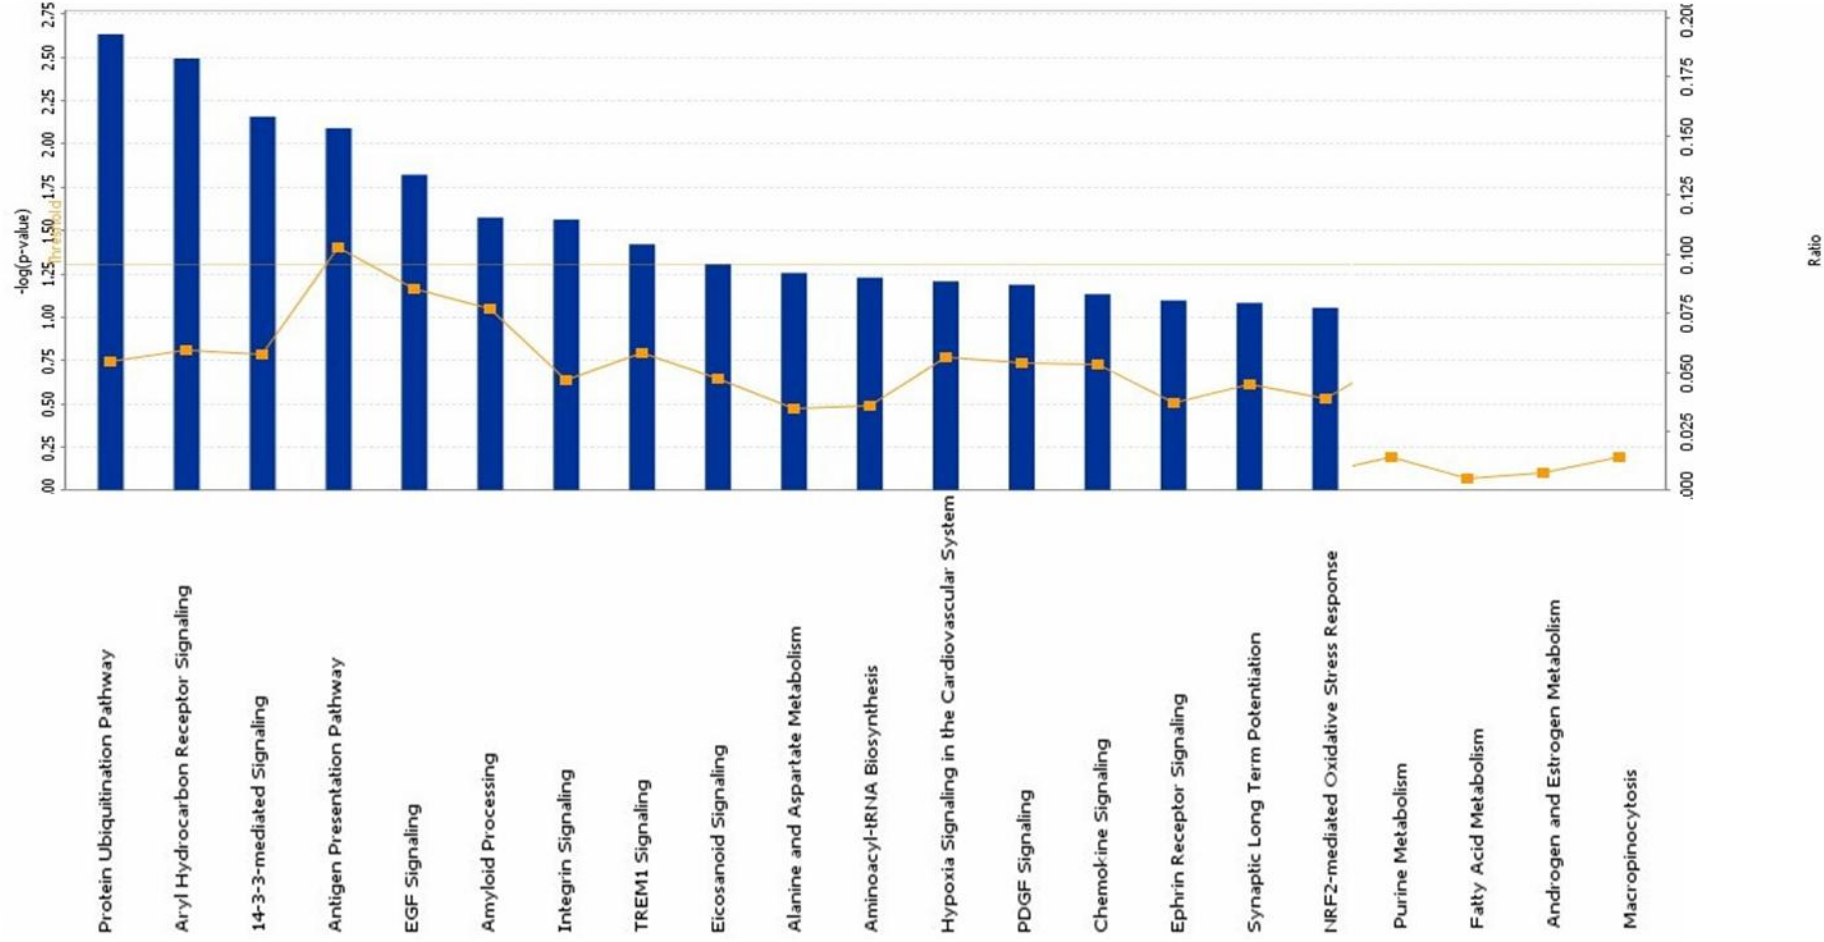

Supplement: MOESM4 [file 9576380]
